# Supplementary material for: Lymphocyte Subpopulations Associated with Neutralizing Antibody Levels of SARS-CoV-2 for COVID-19 Vaccination
Source: MDPI journal article supplement (doi:10.3390/vaccines10091550), 2022-09-17
Supplement: s1 [file s1]

**Table S1. Details of clones and concentrations of antibodies used for flow cytometry study**

| Antibody           | Panels                | Clone          | Fluorophores      | Antibody (uL)/<br>100uL blood |
|--------------------|-----------------------|----------------|-------------------|-------------------------------|
| CD45               | All panels, cytokine  | 2D1            | APC-H7            | 2.5, 5*                       |
| CD3                | I, III, IV, V VI, VII | UCHT1          | V500              | 2.5                           |
| CD3                | Cytokine              | SK7            | FITC              | 20*                           |
| CD4                | I, VI, cytokine       | L200           | V450, BV421       | 2.5, 5*                       |
| CD4                | III, V                | SK3            | V450              | 2.5                           |
| CD8                | I, cytokine           | SK1            | PerCP-Cy5.5, APC  | 5, 5*                         |
| CD8                | IV                    | RPA-T8         | V450              | 2.5                           |
| CD19               | I                     | SJ25C1         | APC               | 2.5                           |
| CD19               | II                    | HIB19          | V500              | 2.5                           |
| CD16               | I, cytokine           | B73.1          | PE-Cy7            | 2.5, 5*                       |
| CD16               | VII                   | 3G8            | V450              | 2.5                           |
| CD56               | I, cytokine           | NCAM16.2       | PE-Cy7            | 2.5, 5*                       |
| CD38               | I, II                 | HB7            | PE, PE-Cy7        | 5, 2.5                        |
| HLA-DR             | I, V                  | L243           | FITC              | 5                             |
| CD138              | II                    | MI15           | V450              | 2.5                           |
| IgM                | II                    | G20-127        | APC               | 10                            |
| IgD                | II                    | IA6-2          | FITC              | 5                             |
| CD21               | II                    | B-ly4          | PE                | 5                             |
| CD27               | II                    | M-T271         | PerCP-Cy5.5       | 2.5                           |
| CD45RA             | III, IV, VI           | HI100          | FITC, PerCP-Cy5.5 | 5                             |
| CD45RO             | III, IV, V            | UCHL1          | PerCP-Cy5.5       | 2.5                           |
| CCR3               | III                   | 5E8            | PE                | 2.5                           |
| CCR5               | III, IV               | 2D7/CCR5       | PE-Cy7, PE        | 2.5, 5                        |
| CCR7               | III, IV               | 3D12           | Alexa 647         | 2.5                           |
| CCR6               | IV                    | 11A9           | PE-Cy7            | 2.5                           |
| CD25               | V                     | 2A3            | PE                | 5                             |
| CD127              | V                     | HIL-7R-M21     | Alexa 647         | 5                             |
| TCR $\alpha/\beta$ | VI                    | WT31           | FITC              | 5                             |
| CD31               | VI                    | WM59           | PE                | 5                             |
| CD62L              | VI                    | DREG-56        | PE-Cy7            | 5                             |
| TCR $\gamma\delta$ | VI                    | B1             | APC               | 5                             |
| CD94               | VII                   | HP-3D9         | FITC              | 5                             |
| CD314<br>(NKG2D)   | VII                   | 1D11           | PE                | 5                             |
| CD161              | VII                   | HP-3G10        | BB700             | 2.5                           |
| CD122              | VII                   | Mik- $\beta$ 3 | APC               | 5                             |
| TNF- $\alpha$      | Cytokine              | MAb11          | PE                | 5*                            |
| IFN- $\gamma$      | Cytokine              | 4S.B3          | PerCP-Cy5.5       | 5*                            |
| IL-2               | Cytokine              | MQ1-17H12      | BV510             | 5*                            |
| IL-21              | Cytokine              | 3A3-N2.1       | PE                | 5*                            |
| TGF- $\beta$       | Cytokine              | TW4-2F8        | PerCP-Cy5.5       | 5*                            |
| IL-17              | Cytokine              | N49-653        | BV510             | 5*                            |

\* The quantities of antibodies used for cytokine assays; Vendor: BD Biosciences
